# Supplementary material for: A direct template synthesis of nanoporous carbons with high mechanical stability using as-synthesized MCM-48 hostsElectronic supplementary information (ESI) available: Fig. S1: TEM images. Fig. S2: adsorption–desorption isotherms. Fig. S3: schematic for carbonization process. Fig. S4: TGA data. See http://www.rsc.org/suppdata/cc/b2/b202307p/
Source: Royal Society of Chemistry journal article supplement (doi:10.1039/b202307p), 2002-06-17
Supplement: b202307p2.pdf [file b202307p2.pdf]

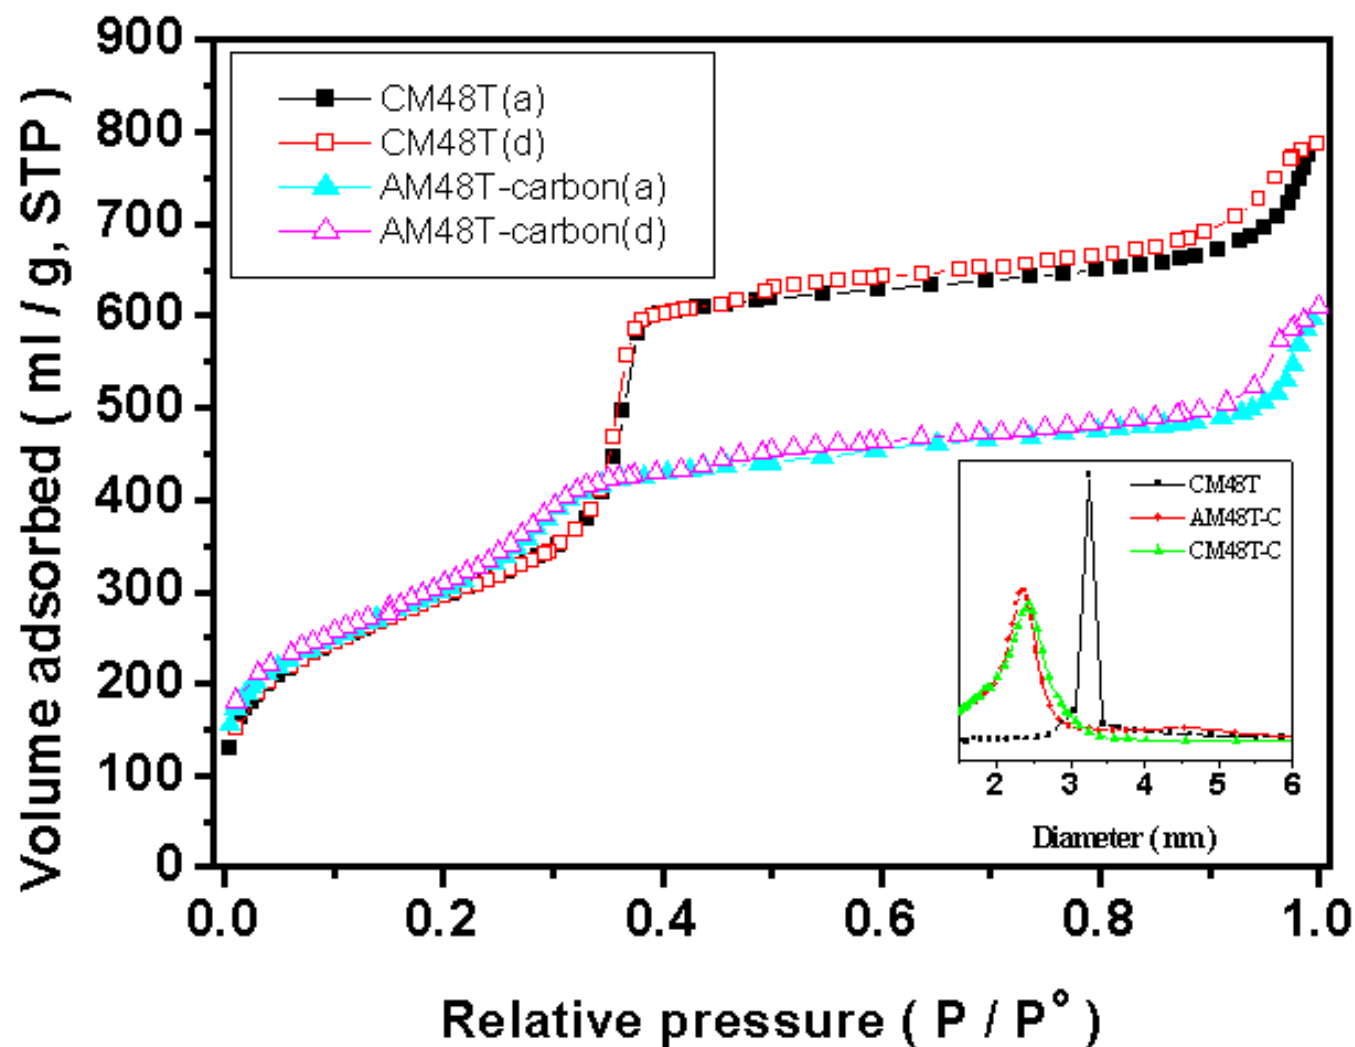

N<sub>2</sub> adsorption and desorption isotherms of the CM48T and the AM48T-carbon replica. The Insert provides the corresponding pore size distribution curves calculated from the adsorption branch of the nitrogen isotherm by the BJH method. The isotherms were measured at 77 K on a Micromeritics ASAP 2000 Gas Adsorption Analyzer after the silica template and carbons were degassed at 423 K to 20  $\mu$ Torr for 4 ~ 6 h.
